# Supplementary material
Source: Springer Nature journal article supplement (https://www.springermedizin.de/resource/supplementary/11689_2012_35_MOESM2_ESM.pdf/9673158)

## mUPD

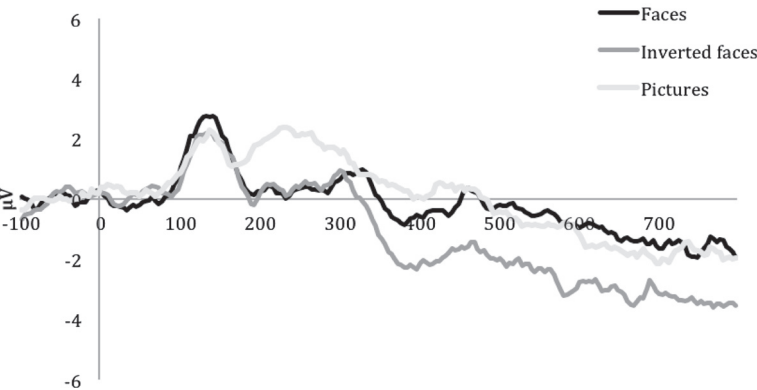

## Deletion

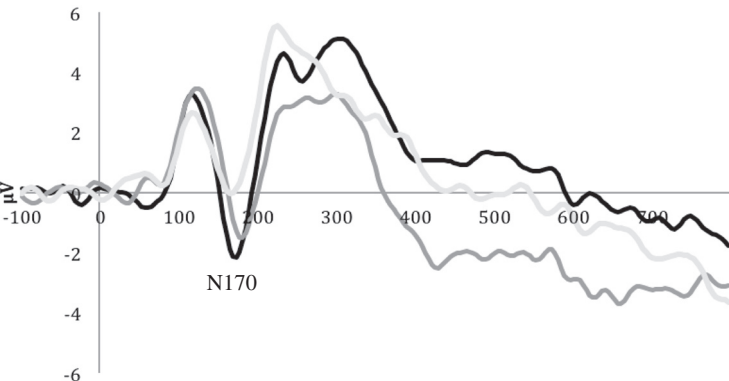

Supplement: MOESM2 [file 9673158]
